# Supplementary material for: Self-formed silver nanoparticles on freestanding silicon nanowire arrays featuring SERS performances
Source: Royal Society of Chemistry journal article supplement (doi:10.1039/c9ra03273h), 2019-01-01
Supplement: c9ra03273h1.pdf [file c9ra03273h1.pdf]

## Electronic Supplementary Information

### Self-formed silver nanoparticles on freestanding silicon nanowire arrays featuring SERS performances

Pin-Ju Chien,<sup>a</sup> Yongcun Zhou,<sup>b</sup> Kun-Hung Tsai,<sup>a</sup> Hong Phan Duong,<sup>c</sup> and Chia-Yun Chen<sup>\*ad</sup>

<sup>a</sup> Department of Materials Science and Engineering, National Cheng Kung University, No.1 University Road, Tainan 70101, Taiwan

<sup>b</sup> School of Materials Science and Engineering, Northwestern Polytechnical University, Xi'an 710072, Shaanxi, People's Republic of China

<sup>c</sup> The University of Danang, University of Science and Technology, 54 Nguyen Luong Bang, Vietnam

<sup>d</sup> Hierarchical Green-Energy Materials (Hi-GEM) Research Center, National Cheng Kung University, No.1 University Road, Tainan 70101, Taiwan.

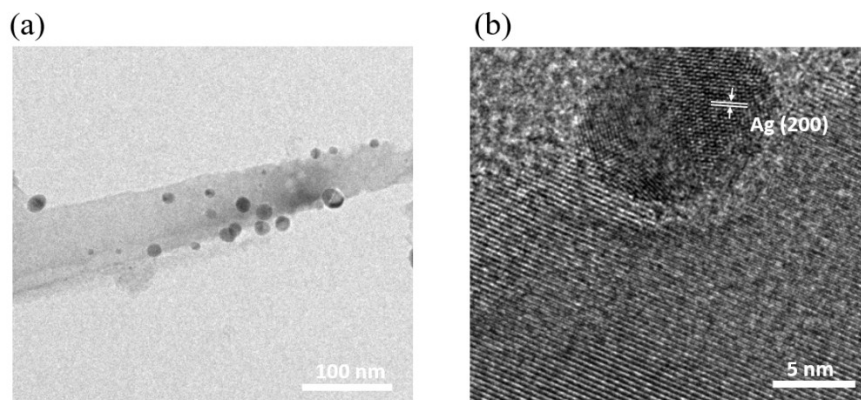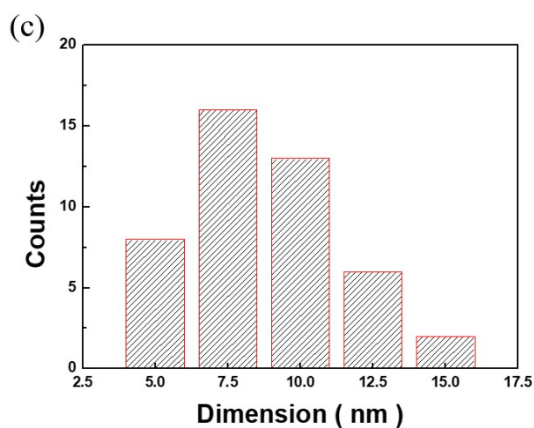

**Figure S1** (a) Representative TEM image of a transferred SiNW. (b) Representative HRTEM image of a AgNP coated on SiNW. (c) Size distribution of AgNPs.

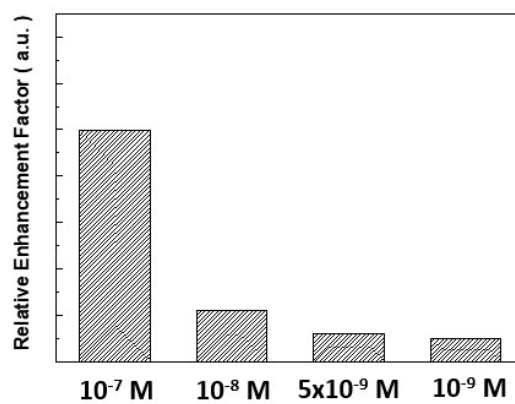

**Figure S2** REFs of SiNW films with self-formed AgNPs for detecting various concentrations of R6G molecules.
